# Supplementary material
Source: PubMed Central journal article supplement (PMC6610236)
Supplement: NIHMS1030398-supplement-Supplemental_Figures.pdf [file NIHMS1030398-supplement-Supplemental_Figures.pdf]

## Supporting Information

### **A systematic proteogenomic approach to exploring a novel function for NHERF1 in human reproductive disorder: lessons for exploring missing proteins**

Keun Na<sup>1</sup>, Heon Shin<sup>2</sup>, Jin-Young Cho<sup>2</sup>, Sang Hee Jung<sup>3</sup>, Jaeseung Lim<sup>4</sup>, Jong-Sun Lim<sup>1</sup>, Eun Ah Kim<sup>3</sup>, Hye Sun Kim<sup>4</sup>, Ah Reum Kang<sup>4</sup>, Ji Hye Kim<sup>4</sup>, Jeong Min Shin<sup>5</sup>, Seul-Ki Jeong<sup>1</sup>, Chae-Yeon Kim<sup>2</sup>, Jun Young Park<sup>2</sup>, Hyung-Min Chung<sup>6</sup>, Gilbert S. Omenn<sup>7</sup>, William S. Hancock<sup>8</sup>, and Young-Ki Paik<sup>1,2,9\*</sup>

<sup>1</sup>Yonsei Proteome Research Center, Yonsei University, Seoul 03722, South Korea, <sup>2</sup>Department of Integrated OMICS for Biomedical Science, Yonsei University, Seoul 03722, South Korea, <sup>3</sup>Department of Obstetrics and Gynecology, CHA Bundang Medical Center, CHA University, Seongnam 13496, South Korea, <sup>4</sup>CHA Biotech Co., Ltd., Seoul 05053, South Korea, <sup>5</sup>Department of Biochemistry, CHA University, Seongnam 13496, South Korea, <sup>6</sup>Department of Stem Cell Biology, School of Medicine, Konkuk University, Seoul 143701, South Korea, <sup>7</sup>Center for Computational Medicine and Bioinformatics, University of Michigan, Ann Arbor, Michigan 48109, United States, <sup>8</sup>Department of Chemical Biology,

Northeastern University, Boston, Massachusetts 02115, United States, <sup>9</sup>Department of Biochemistry, College of Life Science and Biotechnology, Yonsei University, Seoul 03722, South Korea

### **Corresponding Author**

\* E-mail: [paikyk@yonsei.ac.kr](mailto:paikyk@yonsei.ac.kr)

### **Table of Contents**

**Figure S1.** Generation of transgenic *C. elegans* which contains an extra-chromosomal human *NHERF1* gene.

**Figure S2.** Validation by immunoblotting of RNF121 and INPPL1.

**Figure S3.** Illustration of an indel position within the *nrf1-1* gene of *nrf1-1(ok297)* mutants (from WormBase).

**Table S1.** Clinical criteria for hPE diagnosis.

**Table S2.** Clinical characteristics of hPN and hPE subjects.

**Table S3.** List of 39 candidate proteins from GPMDB (2011-09 release).

**Table S4A.** Peptide lists identified as INPPL1 by LC-MS/MS analysis.

**Table S4B.** Peptide view: MS/MS fragmentation of query number 2068 for Table S4A.

**Table S5.** Validation and characterization step of eight candidate proteins (GPMDB, 2011-09 release).

**Table S6A.** Peptide lists identified as NHERF1 by LC-MS/MS analysis.

**Table S6B.** Peptide view: MS/MS fragmentation of query number 4829 for Table S6A.

**Table S7.** List of 111 genes differentially expressed between trophoblasts of hPN and hPE.

**Table S8.** Transcript level of 39 candidate proteins by RNA Sequencing (GPMDB, 2011-9 release).

**Table S9.** List of 155 proteins differentially expressed between FK-SC and FK-siRNA.

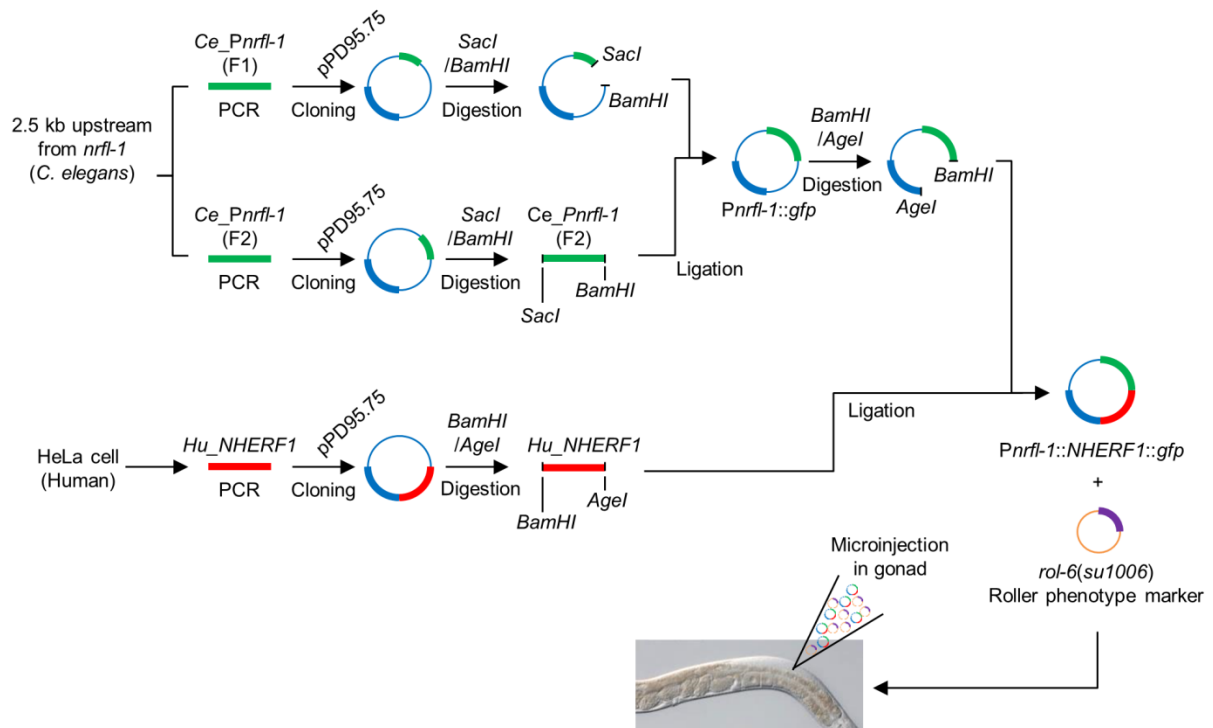

**Figure S1. Generation of transgenic *C. elegans* which contains an extra-chromosomal human *NHERF1* gene.**

A part of upstream fragment (2.5 kb) of the *nrfl-1* gene promoter (F1) was amplified by PCR using the oligonucleotide primers that contain not only the terminal ends of the target gene but also the sequence of restriction enzyme sites (*HindIII*, *SacI*). The newly created fragments were digested with restriction enzyme (*HindIII*, *SacI*) and inserted into the same restriction sites of pPD95.75 vector. We also amplified the other promoter region of *nrfl-1* (F2) which contains restriction enzyme sequence (*SacI*, *BamHI*) sites in the same manner. These two fragments were then combined into one expression vector by inserting F2 into restriction sites (*SacI*, *BamHI*) of the pPD95.75 vector containing F1. In a separate reaction, cDNA of NHERF1 was prepared from the total mRNA from human HeLa cells. Linker of restriction enzyme sequence (*BamHI*, *AgeI*) was attached to this cDNA of *Hu\_NHERF1* and the resulting DNA fragment was amplified by PCR. The *Hu\_NHERF1* gene was digested by restriction enzymes (*BamHI*, *AgeI*) and then inserted into the expression vector as prepared previously. The sequences of this recombinant DAN was selected by colony PCR. When transfected into cells, this recombinant vector (50 ng/ $\mu$ L) and *rol-6(su1006)* (10 ng/ $\mu$ L), a roller phenotype marker, were microinjected into *C. elegans* gonad.

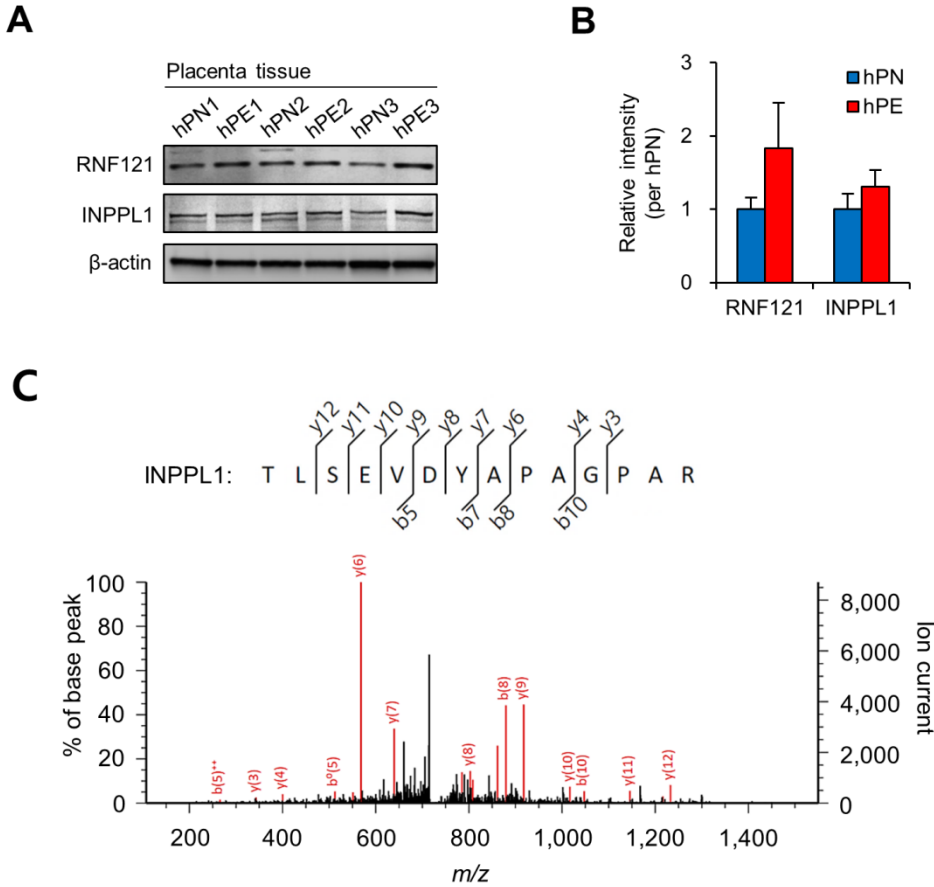

**Figure S2. Validation by immunoblotting of RNF121 and INPPL1.**

(A) Twenty micrograms of protein lysates for individual placenta tissues were used for detection of RNF121 and INPPL1 by Western blot. (B) The relative band intensity was estimated based on the average level for three hPN samples. Their differences between hPN and hPE were not significant ( $P > 0.05$ ). (C) The antibody-captured target band was sliced, tryptic-digested, and identified as only INPPL1; RNF121 was not identified. The MS data show the representative detected INPPL1 peptide sequence “TLSEVDYAPAGPAR.”

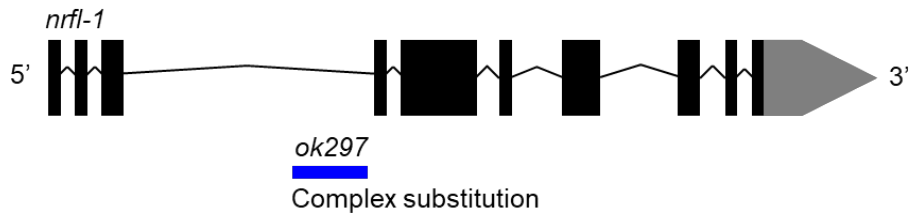

**Figure S3. Illustration of complex substitution position of *nrfl-1(ok297)* mutants (from WormBase).**

The *nrfl-1(ok297)* mutant has an *indel* mutation within the *nrfl-1* gene (724 bp insertion/16 bp deletion), which is located at intron 3 between exon 3 and exon 4 (blue line). Black box = exon; line = intron.
